# Supplementary material
Source: publisher site journal article supplement (https://www.dovepress.com/article/415224)
Supplement: Supplementary file 1 [file get_supplementary_file.php]

## Supplementary Material

# Pan-Cancer Profiling and Digital Pathology Analysis Reveal Negative Prognostic Biomarker ZPR1 Associated with Immune Infiltration and Treatment Response in Hepatocellular Carcinoma

Lian He, Yusai Xie\*, Yusong Qiu, Yong Zhang\*

\* **Correspondence:** Corresponding Author: Yusai Xie, ysxie@cmu.edu.cn; Yong Zhang, zhycmu@163.com

### 1.1 Supplementary Figures

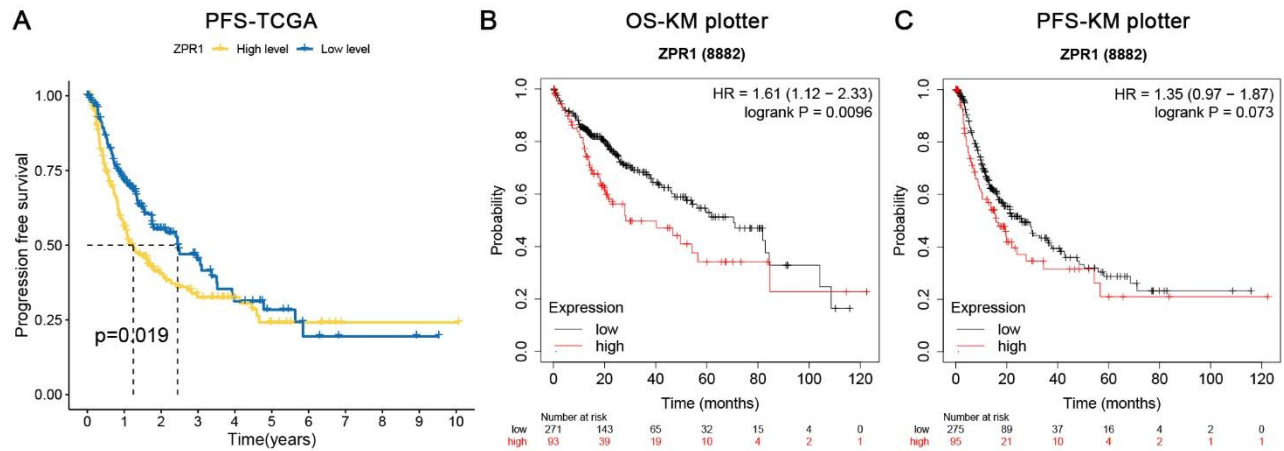

**Supplementary Figure 1.** (A) Progression-free survival analysis of TCGA HCC database. (B) Overall survival and (C) Progression-free survival analysis of Kaplan–Meier database.

## 1.2 Supplementary Table

**Supplementary Table 1.** Cancer types and number of patients from TCGA and GTEx databases.

| Abbreviation | Cancer type                                                      | TCGA   |       | TCGA + GTEx |       |
|--------------|------------------------------------------------------------------|--------|-------|-------------|-------|
|              |                                                                  | Normal | Tumor | Normal      | Tumor |
| ACC          | Adrenocortical carcinoma                                         | 0      | 79    | 128         | 79    |
| BLCA         | Bladder urothelial carcinoma                                     | 19     | 412   | 28          | 412   |
| BRCA         | Breast invasive carcinoma                                        | 113    | 1113  | 292         | 1113  |
| CESC         | Cervical squamous cell carcinoma and endocervical adenocarcinoma | 3      | 306   | 13          | 306   |
| CHOL         | Cholangiocarcinoma                                               | 9      | 35    | 9           | 35    |
| COAD         | Colon adenocarcinoma                                             | 41     | 480   | 349         | 480   |
| DLBC         | B cell lymphoma                                                  | 0      | 48    | 444         | 48    |
| ESCA         | Esophageal carcinoma                                             | 13     | 163   | 668         | 163   |
| GBM          | Glioblastoma multiforme                                          | 5      | 169   | 1157        | 169   |
| HNSC         | Head and neck squamous cell carcinoma                            | 44     | 504   | 44          | 504   |
| KICH         | Kidney chromophobe                                               | 25     | 65    | 53          | 65    |
| KIRC         | Kidney renal clear cell carcinoma                                | 72     | 531   | 100         | 531   |
| KIRP         | Kidney renal papillary cell carcinoma                            | 32     | 291   | 60          | 291   |
| LAML         | Acute myeloid leukemia                                           | 0      | 150   | 70          | 150   |
| LGG          | Brain lower grade glioma                                         | 0      | 532   | 1152        | 532   |
| LIHC         | Liver hepatocellular carcinoma                                   | 50     | 371   | 160         | 371   |
| LUAD         | Lung adenocarcinoma                                              | 59     | 515   | 347         | 515   |
| LUSC         | Lung squamous cell carcinoma                                     | 50     | 498   | 338         | 498   |
| MESO         | Mesothelioma                                                     | 0      | 87    | 0           | 87    |
| OV           | Ovarian serous cystadenocarcinoma                                | 0      | 381   | 88          | 381   |
| PAAD         | Pancreatic adenocarcinoma                                        | 4      | 179   | 171         | 179   |
| PCPG         | Pheochromocytoma and paraganglioma                               | 3      | 184   | 3           | 184   |
| PRAD         | Prostate adenocarcinoma                                          | 52     | 501   | 152         | 501   |
| READ         | Rectum adenocarcinoma                                            | 10     | 107   | 318         | 107   |
| SARC         | Sarcoma                                                          | 2      | 263   | 2           | 263   |
| SKCM         | Skin cutaneous melanoma                                          | 1      | 472   | 813         | 472   |
| STAD         | Stomach adenocarcinoma                                           | 32     | 375   | 206         | 375   |
| TGCT         | Testicular germ cell tumors                                      | 0      | 156   | 165         | 156   |
| THCA         | Thyroid carcinoma                                                | 59     | 512   | 338         | 512   |
| THYM         | Thymoma                                                          | 2      | 120   | 446         | 120   |
| UCEC         | Uterine corpus endometrial carcinoma                             | 35     | 554   | 113         | 554   |
| UCS          | Uterine carcinosarcoma                                           | 0      | 57    | 78          | 57    |
| UVM          | Uveal melanoma                                                   | 0      | 80    | 0           | 80    |
